# Supplementary material for: Understanding Racial Disparities in Gastrointestinal Cancer Outcomes: Lack of Surgery Contributes to Lower Survival in African American Patients
Source: Oxford University Press journal article supplement (doi:10.1158/1055-9965.epi-20-0950), 2020-12-10
Supplement: 10559965epi200950-sup-245662_4_supp_6733976_qk09wg.docx [file 10559965epi200950-sup-245662_4_supp_6733976_qk09wg.docx]

|  | | **Adenocarcinoma** | **Squamous** | **Signet ring /diffuse** |
| --- | --- | --- | --- | --- |
| **Mid-Esophagus** | **White** | 51.9% | 48.1% | 0.0% |
| **Black** | 7.2% | 92.8% | 0.0% |
| **Latinx** | 32.7% | 67.3% | 0.0% |
| **API** | 9.1% | 90.9% | 0.0% |
| **DEGC** | **White** | 93.2% | 6.8% | 0.0% |
| **Black** | 58.4% | 41.6% | 0.0% |
| **Latinx** | 88.6% | 11.4% | 0.0% |
| **API** | 75.2% | 24.8% | 0.0% |
| **Stomach** | **White** | 69.8% | 0.0% | 30.2% |
| **Black** | 76.7% | 0.0% | 23.3% |
| **Latinx** | 65.5% | 0.0% | 34.5% |
| **API** | 69.0% | 0.0% | 31.0% |
| **Pancreas** | **White** | 100.0% | 0.0% | 0.0% |
| **Black** | 100.0% | 0.0% | 0.0% |
| **Latinx** | 100.0% | 0.0% | 0.0% |
| **API** | 100.0% | 0.0% | 0.0% |
| **Colon** | **White** | 98.9% | 0.0% | 0.0% |
| **Black** | 99.2% | 0.0% | 0.8% |
| **Latinx** | 99.1% | 0.0% | 0.9% |
| **API** | 99.0% | 0.0% | 1.0% |
| **Rectum** | **White** | 99.4% | 0.0% | 0.6% |
| **Black** | 99.0% | 0.0% | 1.0% |
| **Latinx** | 99.0% | 0.0% | 1.0% |
| **API** | 98.9% | 0.0% | 1.1% |

Table 1: Histology by cancer site and race/ethnicity
