# Supplementary material for: Understanding Racial Disparities in Gastrointestinal Cancer Outcomes: Lack of Surgery Contributes to Lower Survival in African American Patients
Source: Oxford University Press journal article supplement (doi:10.1158/1055-9965.epi-20-0950), 2020-12-10
Supplement: 10559965epi200950-sup-245662_4_supp_6733977_qk0dwg.docx [file 10559965epi200950-sup-245662_4_supp_6733977_qk0dwg.docx]

|  | **Race/Ethnicity** | | | | | **Organ** | | | | | | **N** |
| --- | --- | --- | --- | --- | --- | --- | --- | --- | --- | --- | --- | --- |
| **White** | **Black** | **Latinx** | **API** | **Other** | **Mid Eso** | **DEGC** | **Stomach** | **Pancreas** | **Colon** | **Rectum** |
| **White** | 100.0 | . | . | . | . | 74.5 | 89.4 | 54.1 | 79.4 | 79.1 | 80.9 | 475604 |
| **Black** | . | 100.0 | . | . | . | 17.2 | 4.4 | 19.6 | 11.5 | 11.9 | 8.4 | 64078 |
| **Latinx** | . | . | 100.0 | . | . | 3.8 | 3.1 | 13.2 | 4.7 | 4.9 | 5.6 | 30932 |
| **API** | . | . | . | 100.0 | . | 3.0 | 1.5 | 10.8 | 2.7 | 2.6 | 3.3 | 18282 |
| **Other** | . | . | . | . | 100.0 | 1.6 | 1.6 | 2.2 | 1.7 | 1.5 | 1.8 | 9761 |
| **Mid Esophagus** | 3.3 | 5.6 | 2.5 | 3.4 | 3.5 | 100.0 | . | . | . | . | . | 20803 |
| **DEGC** | 14.0 | 5.1 | 7.4 | 6.1 | 12.0 | . | 100.0 | . | . | . | . | 74253 |
| **Stomach** | 3.4 | 9.0 | 12.6 | 17.4 | 6.7 | . | . | 100.0 | . | . | . | 29514 |
| **Pancreas** | 17.0 | 18.4 | 15.4 | 14.9 | 18.2 | . | . | . | 100.0 | . | . | 101985 |
| **Colon** | 40.0 | 44.6 | 38.2 | 34.5 | 35.9 | . | . | . | . | 100.0 | . | 240268 |
| **Rectum** | 22.4 | 17.3 | 23.9 | 23.8 | 23.7 | . | . | . | . | . | 100.0 | 131834 |
| **<55** | 17.7 | 24.9 | 29.4 | 24.6 | 24.4 | 15.8 | 16.9 | 17.8 | 13.4 | 17.7 | 29.6 | 116253 |
| **55-64** | 23.3 | 28.5 | 25.7 | 25.1 | 26.2 | 29.1 | 28.8 | 20.0 | 24.6 | 21.0 | 26.6 | 143969 |
| **65-74** | 27.5 | 25.4 | 24.6 | 25.7 | 26.0 | 30.3 | 31.5 | 26.2 | 30.5 | 26.2 | 23.1 | 161959 |
| **75+** | 31.5 | 21.2 | 20.3 | 24.6 | 23.4 | 24.9 | 22.8 | 35.9 | 31.6 | 35.0 | 20.7 | 176477 |
| **Stage 1** | 40.6 | 40.7 | 37.2 | 40.7 | 41.1 | 24.7 | 27.0 | 47.4 | 28.8 | 52.3 | 36.2 | 241926 |
| **Stage 2** | 32.7 | 31.5 | 32.8 | 31.2 | 32.1 | 31.2 | 31.9 | 34.1 | 44.6 | 28.3 | 31.2 | 194870 |
| **Stage 3** | 26.7 | 27.8 | 30.0 | 28.1 | 26.9 | 44.1 | 41.2 | 18.6 | 26.6 | 19.3 | 32.7 | 161861 |
| **Adenocarcinoma** | 95.9 | 90.1 | 92.5 | 89.4 | 93.8 | 42.1 | 91.2 | 70.4 | 100.0 | 99.0 | 99.3 | 567911 |
| **Eso SCC, gastric lintitis plastica gastric diffuse, signet cell** | 4.1 | 10.0 | 7.5 | 10.6 | 6.2 | 57.9 | 8.8 | 29.6 | . | 1.1 | 0.7 | 30746 |
| **No radiation** | 65.7 | 70.9 | 68.6 | 68.0 | 68.4 | 31.1 | 32.8 | 76.5 | 65.4 | 96.9 | 34.4 | 398231 |
| **Radiation given** | 33.6 | 28.2 | 30.4 | 30.9 | 30.1 | 68.6 | 66.9 | 22.8 | 34.0 | 1.9 | 65.2 | 195807 |
| **Unknown** | 0.7 | 0.9 | 1.0 | 1.1 | 1.5 | 0.4 | 0.4 | 0.8 | 0.6 | 1.2 | 0.5 | 4619 |
| **No Chemotherapy** | 48.8 | 49.5 | 44.2 | 46.2 | 49.1 | 31.9 | 27.8 | 48.5 | 36.1 | 70.3 | 32.8 | 290642 |
| **Chemotherapy given** | 48.5 | 46.9 | 51.8 | 49.9 | 45.3 | 66.1 | 70.6 | 47.9 | 60.2 | 25.9 | 65.4 | 290179 |
| **Unknown** | 2.7 | 3.6 | 4.0 | 4.0 | 5.6 | 2.1 | 1.7 | 3.7 | 3.7 | 3.7 | 1.8 | 17835 |
| **Grade 1** | 8.8 | 8.8 | 8.4 | 8.0 | 7.7 | 5.6 | 5.9 | 4.8 | 5.7 | 11.6 | 8.7 | 52194 |
| **Grade 2** | 46.9 | 46.3 | 45.6 | 46.2 | 43.5 | 36.3 | 33.6 | 22.5 | 22.0 | 57.9 | 60.0 | 279704 |
| **Grade 3** | 20.1 | 18.1 | 22.4 | 23.2 | 20.8 | 33.1 | 40.8 | 58.2 | 17.4 | 14.4 | 10.2 | 120148 |
| **Grade 4** | 1.4 | 0.9 | 1.3 | 1.3 | 1.4 | 0.7 | 1.0 | 1.4 | 0.9 | 1.8 | 1.0 | 7834 |
| **Unknown** | 22.9 | 26.0 | 22.4 | 21.2 | 26.6 | 24.3 | 18.7 | 13.1 | 54.1 | 14.3 | 20.1 | 138777 |
| **Surgery given** | 75.7 | 70.0 | 74.8 | 76.9 | 72.7 | 33.7 | 56.5 | 69.6 | 37.7 | 95.8 | 84.0 | 448954 |
| **Surgery day of diagnosis** | 20.2 | 21.9 | 19.2 | 18.7 | 21.4 | 3.3 | 3.5 | 7.2 | 8.4 | 35.4 | 16.9 | 121399 |
| **Male sex** | 57.3 | 50.4 | 57.0 | 55.0 | 58.4 | 68.8 | 82.1 | 56.5 | 49.2 | 49.1 | 59.4 | 338237 |
| **No Comorbidities** | 70.7 | 67.5 | 71.4 | 76.0 | 74.8 | 73.1 | 70.2 | 65.7 | 66.1 | 69.2 | 77.9 | 422895 |
| **1 Comorbidity** | 21.2 | 23.3 | 21.6 | 18.8 | 18.9 | 19.5 | 21.1 | 23.1 | 25.5 | 22.1 | 16.9 | 127814 |
| **2 Comorbidities** | 5.8 | 6.2 | 4.8 | 3.6 | 4.4 | 5.2 | 6.0 | 7.7 | 6.0 | 6.3 | 3.8 | 33882 |
| **3 Comorbidities** | 2.3 | 3.0 | 2.3 | 1.6 | 1.8 | 2.2 | 2.7 | 3.6 | 2.4 | 2.5 | 1.5 | 14066 |
| **Operative Rate 0-25th %ile** | 23.4 | 30.5 | 35.7 | 24.3 | 27.6 | 24.9 | 25.1 | 24.9 | 24.6 | 25.0 | 24.9 | 149180 |
| **25-75%ile** | 50.4 | 47.5 | 44.6 | 52.0 | 43.8 | 49.9 | 49.5 | 49.9 | 50.1 | 50.0 | 49.3 | 297893 |
| **75-90%ile** | 15.8 | 14.3 | 11.2 | 14.4 | 16.1 | 15.0 | 15.3 | 15.2 | 16.1 | 15.1 | 15.6 | 92126 |
| **90+%ile** | 10.3 | 7.7 | 8.5 | 9.4 | 12.5 | 10.2 | 10.0 | 9.9 | 9.2 | 10.0 | 10.3 | 59458 |
| **Community cancer program (CCP)** | 10.9 | 8.0 | 7.8 | 10.9 | 7.5 | 8.3 | 6.7 | 7.8 | 5.3 | 14.4 | 9.9 | 62058 |
| **Comprehensive CCP** | 43.3 | 33.6 | 35.4 | 33.7 | 27.8 | 34.6 | 32.9 | 33.5 | 32.8 | 48.3 | 42.9 | 247489 |
| **Acadmeic program** | 34.1 | 43.9 | 39.7 | 44.8 | 50.4 | 44.1 | 47.0 | 44.4 | 50.4 | 26.2 | 33.8 | 215907 |
| **Integrated netowrk cancer program** | 10.0 | 12.0 | 12.0 | 7.3 | 11.2 | 12.3 | 12.2 | 11.4 | 10.6 | 9.3 | 9.9 | 61163 |
| **Other** | 1.7 | 2.5 | 5.0 | 3.4 | 3.1 | 0.7 | 1.2 | 2.9 | 0.8 | 2.0 | 3.5 | 12040 |
| **Hospital Volume 0-25th %ile** | 25.6 | 21.9 | 21.9 | 22.4 | 18.0 | 24.5 | 24.7 | 25.0 | 24.8 | 24.7 | 24.9 | 148386 |
| **25-75%ile** | 49.8 | 52.2 | 51.4 | 48.5 | 46.1 | 50.3 | 50.1 | 49.8 | 50.2 | 50.1 | 49.9 | 299786 |
| **75-90%ile** | 14.6 | 15.4 | 14.8 | 18.3 | 22.6 | 14.9 | 14.8 | 15.1 | 15.1 | 14.9 | 15.0 | 89591 |
| **90+%ile** | 9.9 | 10.4 | 11.9 | 10.9 | 13.4 | 10.3 | 10.4 | 10.2 | 10.0 | 10.2 | 10.1 | 60895 |
| **2004-2007** | 22.5 | 20.9 | 19.4 | 19.9 | 23.9 | 24.9 | 19.9 | 18.2 | 20.5 | 22.4 | 24.4 | 132308 |
| **2008-2011** | 37.6 | 38.0 | 36.7 | 34.6 | 36.9 | 31.4 | 31.6 | 34.8 | 35.7 | 41.9 | 35.8 | 224497 |
| **2012-2015** | 39.9 | 41.1 | 43.9 | 45.5 | 39.2 | 43.8 | 48.5 | 47.0 | 43.9 | 35.6 | 39.8 | 241852 |
| **Northeast** | 22.9 | 17.7 | 20.1 | 21.0 | 24.2 | 22.4 | 23.9 | 25.1 | 22.5 | 21.9 | 20.8 | 132683 |
| **Midwest** | 27.6 | 20.9 | 8.7 | 11.4 | 23.0 | 24.2 | 27.7 | 19.8 | 24.8 | 25.2 | 26.3 | 151796 |
| **South** | 33.7 | 54.1 | 36.5 | 15.9 | 27.4 | 38.6 | 32.3 | 35.0 | 36.6 | 36.5 | 33.6 | 211584 |
| **West** | 14.1 | 4.8 | 29.7 | 48.4 | 22.3 | 14.1 | 15.0 | 17.2 | 15.4 | 14.5 | 15.8 | 90553 |
| **Unknown** | 1.7 | 2.5 | 5.0 | 3.4 | 3.1 | 0.7 | 1.2 | 2.9 | 0.8 | 2.0 | 3.5 | 12040 |
| **Zip Income Quartile: Bottom** | 13.9 | 43.6 | 26.3 | 7.2 | 17.8 | 21.5 | 15.3 | 21.4 | 17.2 | 17.8 | 17.4 | 105369 |
| **Second** | 24.0 | 22.3 | 24.0 | 14.3 | 20.5 | 23.9 | 24.2 | 22.1 | 23.2 | 23.4 | 23.7 | 140514 |
| **Third** | 27.8 | 18.3 | 26.8 | 25.8 | 26.0 | 25.4 | 28.0 | 25.3 | 26.2 | 26.5 | 26.8 | 159234 |
| **Top Quartle** | 33.3 | 14.9 | 22.2 | 51.8 | 34.5 | 28.8 | 32.1 | 30.7 | 31.6 | 31.4 | 31.2 | 187661 |
| **Unknown** | 1.0 | 0.9 | 0.8 | 0.9 | 1.2 | 0.5 | 0.4 | 0.5 | 1.8 | 1.0 | 0.9 | 5879 |
| **No Insurance** | 2.1 | 5.8 | 9.6 | 4.6 | 3.2 | 3.9 | 2.1 | 3.6 | 2.5 | 2.8 | 3.8 | 17701 |
| **Private Insurance** | 34.8 | 32.2 | 33.7 | 40.1 | 37.8 | 28.9 | 35.4 | 28.5 | 30.7 | 32.4 | 43.8 | 207633 |
| **Medicaid** | 3.5 | 10.9 | 14.1 | 11.7 | 6.8 | 8.7 | 5.0 | 7.8 | 4.9 | 4.3 | 5.9 | 30977 |
| **Medicare** | 56.4 | 47.4 | 38.5 | 41.0 | 42.1 | 54.1 | 52.6 | 56.3 | 58.5 | 57.9 | 42.9 | 322188 |
| **Other Government** | 1.2 | 1.3 | 0.7 | 0.9 | 4.1 | 1.9 | 2.1 | 1.0 | 1.2 | 0.8 | 1.4 | 7258 |
| **Unknown** | 2.0 | 2.4 | 3.4 | 1.7 | 6.0 | 2.6 | 2.8 | 2.7 | 2.2 | 1.8 | 2.1 | 12899 |
| **Urban** | 79.0 | 88.6 | 92.7 | 94.8 | 79.0 | 81.6 | 79.0 | 86.2 | 80.3 | 82.6 | 79.6 | 486356 |
| **Adjacent to Urban** | 12.2 | 7.5 | 3.4 | 1.2 | 10.4 | 11.3 | 12.6 | 8.0 | 11.0 | 10.1 | 11.9 | 65246 |
| **Rural** | 5.6 | 1.8 | 1.7 | 1.2 | 7.4 | 4.5 | 5.7 | 3.3 | 4.9 | 4.4 | 5.7 | 29210 |
| **Unknown** | 3.1 | 2.2 | 2.2 | 2.8 | 3.3 | 2.6 | 2.8 | 2.6 | 3.8 | 2.9 | 2.8 | 17845 |

Table 2: Descriptive statistics, detailed table
