# Supplementary material for: Understanding Racial Disparities in Gastrointestinal Cancer Outcomes: Lack of Surgery Contributes to Lower Survival in African American Patients
Source: Oxford University Press journal article supplement (doi:10.1158/1055-9965.epi-20-0950), 2020-12-10
Supplement: 10559965epi200950-sup-245662_4_supp_6733980_qk0pwg.docx [file 10559965epi200950-sup-245662_4_supp_6733980_qk0pwg.docx]

|  | Esophagus | | GEJ | | Gastric Body | | Pancreas | | Colon | | Rectum | |
| --- | --- | --- | --- | --- | --- | --- | --- | --- | --- | --- | --- | --- |
|  | HR | ΔHR | HR | ΔHR | HR | ΔHR | HR | ΔHR | HR | ΔHR | HR | ΔHR |
| Default analysis | 1.040 | 0.060 | 1.024 | 0.091 | 0.920 | 0.069 | 0.920 | 0.052 | 1.098 | 0.030 | 1.135 | 0.066 |
| Same day surgery included | 1.037 | 0.059 | 1.028 | 0.094 | 0.922 | 0.068 | 0.921 | 0.052 | 1.091 | 0.034 | 1.135 | 0.065 |
| Random effects for hospital | 1.026 | 0.067 | 1.025 | 0.099 | 0.919 | 0.075 | 0.932 | 0.061 | 1.088 | 0.027 | 1.135 | 0.067 |
| Stage IV only | 0.947 | 0.007 | 0.983 | 0.016 | 0.939 | -0.002 | 0.960 | 0.001 | 1.026 | 0.029 | 1.097 | 0.052 |
| Unknown stage | 1.025 | 0.042 | 1.086 | 0.073 | 0.939 | 0.048 | 1.005 | 0.062 | 1.111 | 0.025 | 1.145 | 0.053 |

Table 5: Sensitivity Analyses. Black/White surgery ΔHR (disparity attributable to surgery) under changes to analysis
